# Supplementary material
Source: PubMed Central journal article supplement (PMC8547140)
Supplement: NIHMS1646135-supplement-1.pdf [file NIHMS1646135-supplement-1.pdf]

**Supplemental Table 1. KEGG pathways differentially expressed between primary and metastatic ID8<sub>VEGF-eLuc</sub> tumors.**

| Gene Set                                           | Number of Genes | Direction | FDR        | Genes                                                                                                                                                                                                                                                                                                                                                                                                          |
|----------------------------------------------------|-----------------|-----------|------------|----------------------------------------------------------------------------------------------------------------------------------------------------------------------------------------------------------------------------------------------------------------------------------------------------------------------------------------------------------------------------------------------------------------|
| Citrate Cycle<br>TCA Cycle                         | 26              | Down      | 1.85E-06   | IDH1, SDHC, PCK1, IDH3B, ACO1, SDHB, MDH2, SUCLG1, SUCLG2, IDH2, IDH3A, SDHD, DLAT, IDH3G, PDHA1, CS, OGDH, MDH1, ACLY, DLST, DLD, SDHA, PCK2, SUCLA2, PDHB, ACO2                                                                                                                                                                                                                                              |
| Valine<br>Leucine and<br>Isoleucine<br>Degradation | 38              | Down      | 6.97E-05   | HIBCH, AOX1, ALDH9A1, IVD, HMGCS2, DBT, MCCC1, HADH, ACADM, HMGCL, HADHB, HADHA, ACADS, ALDH2, HIBADH, BCAT2, MCEE, ACADSB, BCKDHA, ECHS1, BCKDHB, ACAD8, ACAT1, PCCB, HSD17B10, ALDH3A2, DLD, ALDH6A1, HMGCS1, AUH, MCCC2, PCCA, OXCT1, ABAT, MUT, ACAT2, ACAA2, ALDH7A1                                                                                                                                      |
| Ppar signaling<br>pathway                          | 40              | Down      | 4.30E-04   | CYP27A1, ACADL, DBI, RXRA, SLC27A4, PCK1, NR1H3, PLTP, HMGCS2, FABP4, ACADM, FABP3, AQP7, CPT2, SCP2, ACOX3, CD36, UBC, PPARG, OLR1, ILK, CPT1C, PLIN1, ACSL1, LPL, SLC27A1, ME1, ACSL4, ACOX1, PCK2, ADIPOQ, PPARD, RXRB, PDPK1, ANGPTL4, SLC27A6, CPT1A, ACSL5, FADS2, SORBS1                                                                                                                                |
| Ribosome                                           | 80              | Up        | 0.00299212 | RPL31, RPL37A, RPL35, RPL7, RPL7A, RPL12, RPS21, RPL22L1, RPL34, RPL22, RPS20, UBA52, RPS6, RPS8, RPL11, RPL5, RPLP0, RPL6, RPL21, RPL9, RPL32, RPS9, RPL28, RPS5, RPS19, RPS16, RPL18, RPL27A, RPLP2, RPS11, RPL13A, RPS17, RPS3, RPS13, RPS15A, RPL13, RPL18A, RPS25, RPL4, RPS27L, RSL24D1, RPL29, RPSA, RPL14, RPLP1, RPL10, RPL36A, RPL39, RPS4X, RPS15, RPS12, RPL41, RPS26, RPL26, RPL19, RPL27, RPL38, |

|                                          |     |      |            |                                                                                                                                                                                                                                                                                                                                                                                                                                                                                                                                                                                                                                                                                                                                            |
|------------------------------------------|-----|------|------------|--------------------------------------------------------------------------------------------------------------------------------------------------------------------------------------------------------------------------------------------------------------------------------------------------------------------------------------------------------------------------------------------------------------------------------------------------------------------------------------------------------------------------------------------------------------------------------------------------------------------------------------------------------------------------------------------------------------------------------------------|
|                                          |     |      |            | RPS27A, RPL23A, RPL23, RPS7, RPS29, RPS23, RPS24, RPL15, RPL37, RPL8, RPL30, MRPL13, RPL3, RPL35A, RPL24, FAU, RPS2, RPL10A, RPL36, RPS10, RPS28, RPS18, RPL17                                                                                                                                                                                                                                                                                                                                                                                                                                                                                                                                                                             |
| Butanoate Metabolism                     | 23  | Down | 0.01448559 | ALDH9A1, HMGCS2, BDH2, HADH, HMGCL, AACs, HADHA, ACADS, ALDH2, AKR1B10, ACSM3, ECHS1, ACAT1, PDHA1, ALDH3A2, HMGCS1, ALDH5A1, PDHB, OXCT1, ABAT, BDH1, ACAT2, ALDH7A1                                                                                                                                                                                                                                                                                                                                                                                                                                                                                                                                                                      |
| Thyroid Cancer                           | 22  | Down | 0.01448559 | TPR, RXRA, TPM3, NRAS, PPARG, BRAF, TCF7L1, KRAS, MAPK3, CCND1, CDH1, CTNNB1, MAP2K1, CCDC6, MAP2K2, TCF7, NCOA4, MYC, MAPK1, TFG, RXRB, TCF7L2                                                                                                                                                                                                                                                                                                                                                                                                                                                                                                                                                                                            |
| Propanoate Metabolism                    | 27  | Down | 0.01600618 | HIBCH, ALDH9A1, ACSS2, ACSS1, ACADM, ACACB, HADHA, ALDH2, SUCLG1, SUCLG2, LDHB, LDHA, MCEE, ECHS1, MLYCD, ACAT1, PCCB, ACSS3, ACACA, ALDH3A2, ALDH6A1, SUCLA2, PCCA, ABAT, MUT, ACAT2, ALDH7A1                                                                                                                                                                                                                                                                                                                                                                                                                                                                                                                                             |
| Basal Cell Carcinoma                     | 28  | Down | 0.01633638 | FZD7, WNT6, FZD5, WNT4, DVL1, FZD1, FZD9, SMO, TCF7L1, FZD4, WNT11, CTNNB1, DVL2, FZD2, AXIN2, TCF7, GLI3, PTCH1, WNT5A, BMP4, FZD6, WNT10B, DVL3, GSK3B, AXIN1, APC, SUFU, TCF7L2                                                                                                                                                                                                                                                                                                                                                                                                                                                                                                                                                         |
| Glyoxylate and Dicarbolxylate Metabolism | 13  | Down | 0.01633638 | ACO1, GRHPR, HYI, MTHFD2L, MDH2, MTHFD2, MTHFD1L, CS, AFMID, MDH1, MTHFD1, ACO2, PGP                                                                                                                                                                                                                                                                                                                                                                                                                                                                                                                                                                                                                                                       |
| Pyruvate Metabolism                      | 28  | Down | 0.01816834 | ALDH9A1, ACSS2, PCK1, ACSS1, GRHPR, ACACB, MDH2, ALDH2, LDHB, LDHA, DLAT, ACAT1, ME1, PDHA1, ACACA, MDH1, ACYP2, ALDH3A2, DLD, ACYP1, PCK2, PDHB, HAGH, ACAT2, HAGHL, GLO1, ALDH7A1, ME2                                                                                                                                                                                                                                                                                                                                                                                                                                                                                                                                                   |
| Wnt Signaling Pathway                    | 100 | Down | 0.01816834 | FZD7, WNT6, FZD5, CACYBP, PPP2R5A, PLCB1, PLCB4, CSNK2A1, TBL1XR1, CAMK2D, PPP3CA, VANGL1, PRKACB, MAP3K7, WNT4, CTNNBIP1, DVL1, JUN, FZD1, CTBP1, FZD9, RAC1, CUL1, RUVBL1, TCF7L1, CCND2, LRP6, FZD4, WNT11, PRKCB, CTBP2, CCND1, SFRP1, PPP2CB, PRKACA, NKD1, NFATC3, NFAT5, CSNK2A2, PPP2R1B, RHOA, CTNNB1, SMAD3, TBL1X, PORCN, PRKX, PPP3R1, FBXW11, MAPK9, PPP2CA, DVL2, FZD2, AXIN2, RAC3, CAMK2B, TCF7, NLK, PRKCA, ROCK2, DAAM1, PSEN1, PPP2R5C, PPP2R5E, SFRP4, NKD2, WNT5A, PPP3CB, CAMK2G, MAPK8, CHD8, PPP3CC, FZD6, MYC, RBX1, EP300, RAC2, CSNK1E, WNT10B, DVL3, SENP2, GSK3B, CREBBP, PPP2R1A, AXIN1, PPARC, CCND3, CSNK2B, PPP2R5D, DAAM2, APC, CSNK1A1, SMAD2, ROCK1, SMAD4, NFATC1, BTRC, TCF7L2, LRP5, PPP2R5B, PLCB3 |
| Insulin Signaling Pathway                | 103 | Down | 0.01927561 | EIF4E2, INPP5D, IRS1, AKT3, TSC1, RAPGEF1, PYGB, PTPN1, PCK1, PRKCI, PIK3CA, FOXO1, SHC1, PRKAB2, NRAS, EIF4E, PRKACB, MKNK1, PIK3R3, MTOR, RPS6, PTPRF, PIK3CD, PPP1CB, ACACB, PPP1CC, RHEB, PRKAG2, PPARGC1A,                                                                                                                                                                                                                                                                                                                                                                                                                                                                                                                            |

|                                 |    |      |            |                                                                                                                                                                                                                                                                                                                                                                                                                                                                                                                                  |
|---------------------------------|----|------|------------|----------------------------------------------------------------------------------------------------------------------------------------------------------------------------------------------------------------------------------------------------------------------------------------------------------------------------------------------------------------------------------------------------------------------------------------------------------------------------------------------------------------------------------|
|                                 |    |      |            | PRKAB1, SH2B2, PDE3A, BRAF, HK2, RAF1, KRAS, AKT2, GYS1, PDE3B, MAPK3, PHKG2, CALM3, LIPE, EIF4EBP1, PRKACA, PHKB, INSR, IRS2, IKBKB, PIK3R2, PRKAR2A, CBL, MAP2K1, PIK3CB, ARAF, PHKA2, ELK1, PRKX, PHKA1, MAP2K2, HK1, MKNK2, MAPK9, INPP5K, CRK, FLOT2, ACACA, PRKAR1A, RPTOR, SREBF1, RPS6KB1, GRB2, EXOC7, FASN, CALM1, PRKAR2B, PIK3CG, SOS2, PYGL, AKT1, PIK3R1, SOCS4, PCK2, MAPK8, PRKAA1, PRKAG1, MAPK1, CRKL, GSK3B, CBLB, FLOT1, TRIP10, RHOQ, PDPK1, TSC2, SOS1, CALM2, PPP1CA, PYGM, BAD, RPS6KB2, PPP1R3C, SORBS1 |
| Terpenoid Backbone Biosynthesis | 13 | Down | 0.02176993 | PDSS1, PMVK, HMGCS2, FDPS, DHDDS, MVK, MVD, ACAT1, IDI1, HMGCS1, GGPS1, HMGCR, ACAT2                                                                                                                                                                                                                                                                                                                                                                                                                                             |
| Melanogenesis                   | 61 | Down | 0.02696552 | FZD7, CREB1, WNT6, FZD5, PLCB1, PLCB4, GNAS, CREB3L1, NRAS, CAMK2D, GNAI3, PRKACB, CREB3, WNT4, DVL1, KIT, FZD1, GNAI1, FZD9, MITF, CREB3L2, TCF7L1, RAF1, KRAS, FZD4, WNT11, PRKCB, MAPK3, CALM3, PRKACA, ADCY7, CTNNB1, MAP2K1, GNAI2, PRKX, MAP2K2, DVL2, FZD2, CAMK2B, TCF7, PRKCA, ADCY3, CALM1, EDN1, WNT5A, CAMK2G, EDNRB, FZD6, EP300, ADCY6, WNT10B, MAPK1, DVL3, ADCY5, GSK3B, CREBBP, ADCY9, CALM2, GNAQ, TCF7L2, PLCB3                                                                                               |
| Fatty Acid Metabolism           | 29 | Down | 0.02696552 | ALDH9A1, ACADL, ADH7, ADH5, HADH, ACADM, CPT2, HADHB, ACOX3, HADHA, ACADS, ALDH2, ACADSB, CPT1C, ECHS1, ACSL1, GCDH, ACAT1, ACSL4, ALDH3A2, ACADVL, ACOX1, ECI2, ECI1, ACAT2, ACAA2, ALDH7A1, CPT1A, ACSL5                                                                                                                                                                                                                                                                                                                       |
| Gap Junction                    | 59 | Down | 0.03059318 | TUBA4A, PLCB1, PLCB4, SRC, GNAS, TUBB4B, PDGFC, NRAS, GUCY1A3, GNAI3, PRKACB, PDGFRA, GNAI1, PRKG2, PDGFA, ITPR1, TUBA8, RAF1, KRAS, ITPR2, PRKCB, MAPK3, TJP1, PRKACA, ADCY7, TUBB3, PDGFD, MAP2K5, MAP2K1, GNAI2, PRKX, GJA1, MAP2K2, CDK1, GNA11, EGFR, MAPK7, PRKCA, GRB2, CSNK1D, ADCY3, SOS2, TUBB2A, TUBB2B, TUBA1C, PDGFB, ADCY6, TUBA1B, TUBA1A, MAPK1, ADCY5, ADCY9, ITPR3, SOS1, MAP3K2, PDGFRB, TUBB6, GNAQ, PLCB3                                                                                                   |
